# Supplementary material for: Chemotherapeutics-induced Oct4 expression contributes to drug resistance and tumor recurrence in bladder cancer
Source: PubMed Central journal article supplement (PMC5458172; doi:10.18632/oncotarget.9602), 2016-05-26
Supplement: oncotarget-08-30844-s001.pdf [file oncotarget-08-30844-s001.pdf]

## SUPPLEMENTARY FIGURE

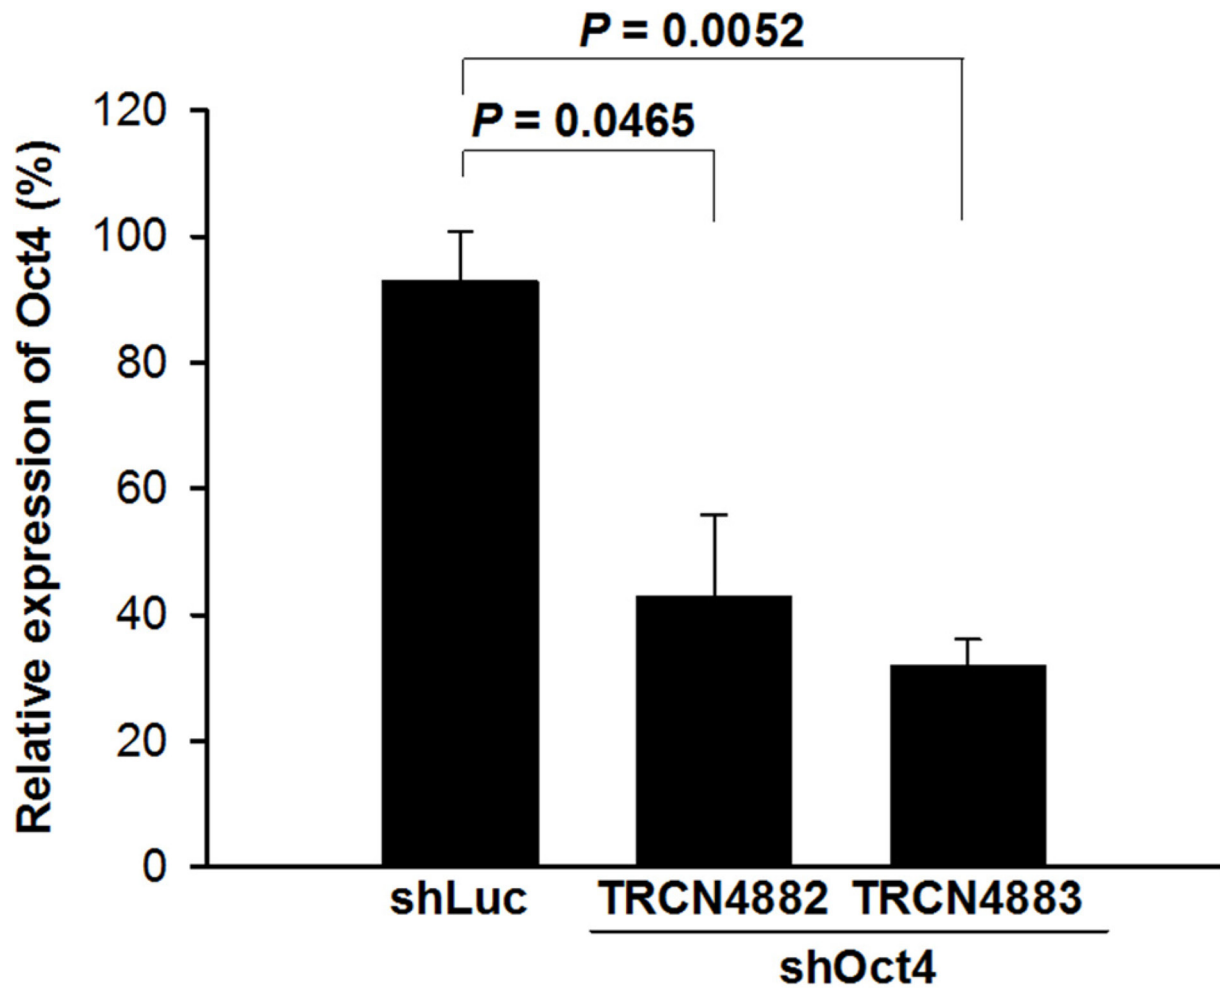

**Supplementary Figure S1: Detection of Oct4 mRNA levels in Oct4 knockdown bladder cancer cells.** TCCSUP cells transduced with lentiviruses expressing Oct4 shRNA (shOct4) or luciferase shRNA (shLuc) were assessed for Oct4 mRNA levels by quantitative real-time RT-PCR analysis. Values shown are the mean  $\pm$  SEM (n = 3-4). Results are representatives of two independent experiments.
